# Supplementary material for: Iron Accumulation and Changes in Cellular Organelles in WDR45 Mutant Fibroblasts
Source: MDPI journal article supplement (doi:10.3390/ijms222111650), 2021-10-28
Supplement: s1 [file s1]

## **Supplementary Information**

### **Iron accumulation and changes of cellular organelles in WDR45 mutant fibroblasts**

Hye Eun Lee<sup>1,†</sup>, Minkyoo Jung<sup>1,†</sup>, Seulgi Noh<sup>1</sup>, Hyebin Choi<sup>2</sup>, Sehyun Chae<sup>2\*</sup>, Jae-Hyeok Lee<sup>3,4\*</sup>,  
Ji Young Mun<sup>1\*</sup>

<sup>1</sup>Neural circuit research group, Korea Brain Research Institute, Daegu, Korea, <sup>2</sup>Neurovascular unit research group, Korea Brain Research Institute, Daegu, Korea, <sup>3</sup>Department of Neurology, Research Institute for Convergence of Biomedical Science and Technology, Pusan National University Yangsan Hospital, Yangsan, Korea, <sup>4</sup>Medical Research Institute, Pusan National University School of Medicine, Yangsan, Korea

## **Materials and Methods**

### **Cell viability assay.**

Cell viability was determined using Cell Counting Kit-8 (CCK-8, Dojindo Laboratories, Japan) according to the manufacturer's instructions. Briefly, cells were seeded in 96-well plates at a density of  $2 \times 10^3$  cells per well. The cells were allowed to adhere for 24, 48 and 72 hours. The OD 450 values were measured, and the growth curve was plotted. The experiments were repeated three times.

### **ROS assay.**

The intracellular content of reactive oxygen species (ROS) was determined by measuring the fluorescence intensity of 2', 7'-dichlorofluorescein (DCF). Cells were grown in 35 mm glass bottomed culture dishes (NEST Biotechnology Co., Wuxi, China, 801001) to 60 - 70 % confluency. Next day, to visualize ROS, H<sub>2</sub>DCFDA (2',7'-dichlorodihydrofluorescein diacetate, Thermo Fisher Scientific, Waltham, MA, USA, D399) was added to the cell medium at a final concentration of 10  $\mu$ M and incubated at 37°C for 30 minutes. The cells were then washed carefully with phosphate-buffered solution. Immediately, cells were observed under a confocal light microscope (Ti-RCP, Nikon, Japan). For Iron scavenger, cells were treated with iron chelator Bpy (2,2'-bipyridine) a final concentration of 1 mM and the cells were further incubated at 37°C for 15 hours. Fluorescence intensity was measured using ImageJ software.

### **mRNA quantification**

For quantitative real-time reverse-transcription PCR (RT-qPCR), RNA was harvested using TRIzol lysis buffer (Invitrogen, Carlsbad, CA, USA), followed by DNase I treatment, and first-stand cDNA synthesis was performed using 1 $\mu$ g of total RNA and oligo(dT) for reverse priming with SuperScript III Supermix (Invitrogen, Carlsbad, CA, USA). Amplification Real-time PCR was performed using a SYBR Green PCR Master Mix (Applied Biosystems, Foster City, CA, USA). Each PCR reaction contained cDNA at a 10-fold dilution, and gene-specific primers. The thermal cycle used was 2 min at 50°C, 10 min at 95°C, 40 cycles of 15 sec denaturation at 95°C with 1 min annealing at 60°C. The mean cycle threshold (CT) values were calculated, with normalization to GAPDH as an internal control. Samples were analyzed using quantitative real-time PCR with gene-specific primer pairs, on a ABI 7500 fast real-time PCR detection system (Life Technologies, Foster City, CA, USA) using the  $\Delta\Delta$ CT method [29]. In each case, multiple reactions were performed using two to three independent biological replicates, with the primers listed in Supplementary Table S3.

## Supplementary Figures

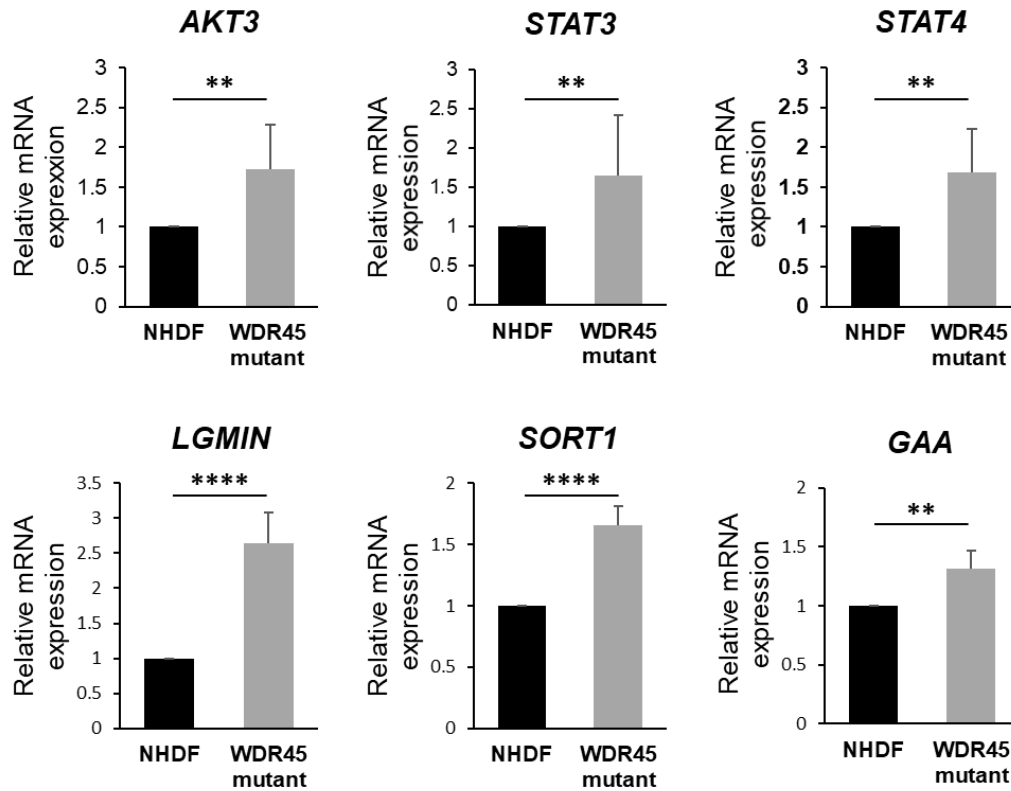

**Supplementary Figure 1.** Relative mRNA levels of the upregulated genes in WDR45 mutant fibroblasts were analyzed by quantitative RT-PCR. mRNA level of each gene was normalized using the GAPDH level. Data are shown as the mean  $\pm$  SD (n = 5-8). \*\*p < 0.01, \*\*\*\*p < 0.0001 by Student's t-test.

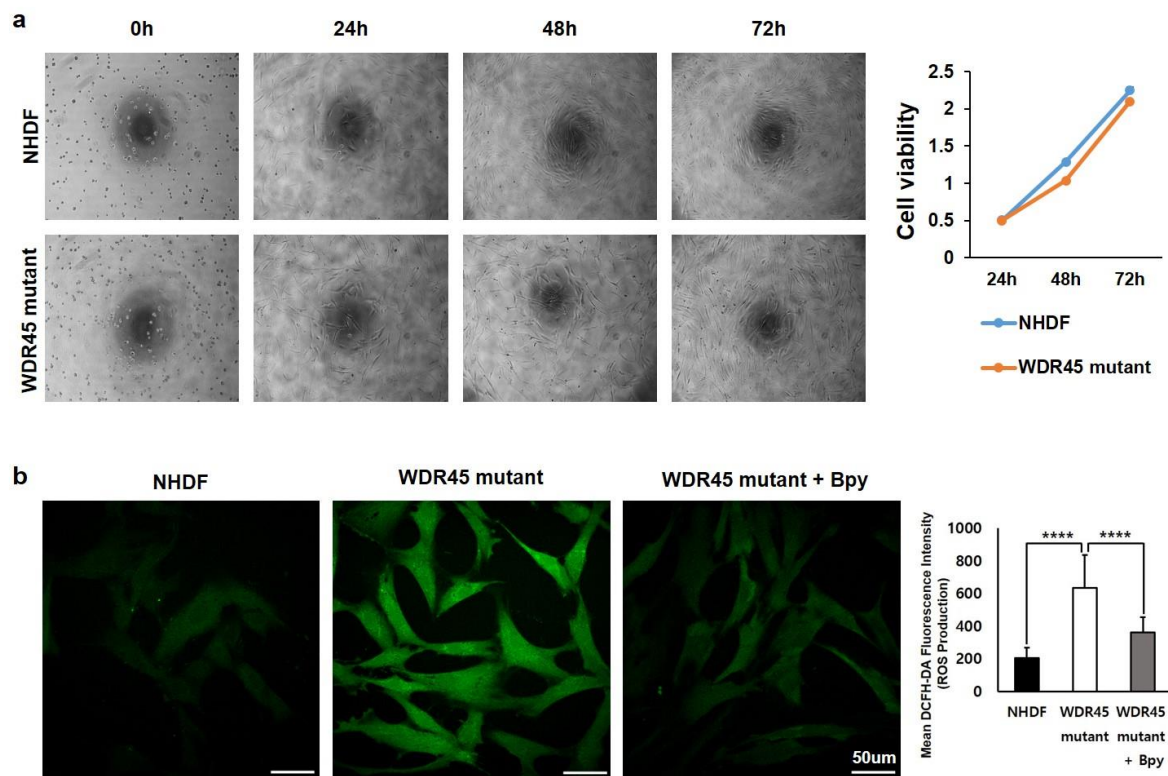

**Supplementary Figure 2.** Cell proliferation was measured by CCK-8 cell viability assay (a), and Detection of ROS by fluorescence intensity measurement using a fluorescence microscope. Intracellular ROS levels assayed with DCFH-DA fluorescent probe treated with or not iron scavenger (Bpy : 2,2'-Bipyridyl) (b). Data are shown as the mean  $\pm$  SD (n = 90). \*\*\*\*p < 0.0001 by Student's t-test.

## Supplementary Tables

**Supplementary Table 1. 2,639 differentially expressed genes (DEGs).** Ensembl IDs, Entrez IDs, symbols, descriptions, P-values, and log2-fold-changes of the DEGs are shown. P-values were computed as described in Materials and Methods section. (See the attached excel file)

**Supplementary Table 2. mRNA seq results.** The numbers of the total reads, unique mapped reads, and mapped reads were shown. UMR represents the number of reads uniquely mapped. ‘% mapped reads’ means the percentage of the mapped reads (UMR and multi-mapped reads) over the total sequenced reads.

| Sample  | Total reads | Unique mapped reads (UMR) | Mapped reads (unique + multiple mapped reads) | % mapped reads |
|---------|-------------|---------------------------|-----------------------------------------------|----------------|
| NHDF-1  | 69,983,503  | 65,091,735                | 66,931,921                                    | 95.6           |
| NHDF-2  | 74,818,864  | 68,512,791                | 70,978,531                                    | 94.9           |
| NHDF-3  | 78,123,920  | 73,040,694                | 75,135,689                                    | 96.2           |
| WDR45-1 | 70,965,313  | 64,139,081                | 67,183,956                                    | 94.7           |
| WDR45-2 | 76,182,187  | 70,074,959                | 72,824,837                                    | 95.6           |
| WDR45-3 | 69,789,911  | 65,017,513                | 66,907,950                                    | 95.9           |

**Supplementary Table 3. Primer information**

| Gene name |         | 5'-3'                    |
|-----------|---------|--------------------------|
| TFEB      | Forward | CCTGGAGATGACCAACAAGCAG   |
|           | Reverse | TAGGCAGCTCCTGCTTCACCAC   |
| ACP5      | Forward | CATGACCACCTTGGCAATGTCTC  |
|           | Reverse | CTGTGGGATCTTGAAGTGCAGG   |
| CTSD      | Forward | GCAAAGTCTGGACATCGCTTG    |
|           | Reverse | GCCATAGTGGATGTCAAACGAGG  |
| VAMP4     | Forward | GCTTATCGGATAATGCAACAGCTT |
|           | Reverse | GCAGCAACCAAAGCCATGATGG   |
| PPARGC1A  | Forward | CCAAAGGATGCGCTCTCGTTCA   |
|           | Reverse | CGGTGTCTGTAGTGGCTTGACT   |
| SLC27A1   | Forward | TGACAGTCGTCCTCCGCAAGAA   |
|           | Reverse | CTTCAGCAGGTAGCGGCAGATC   |
| ACSL4     | Forward | GCTATCTCCTCAGACACACCGA   |
|           | Reverse | AGGTGCTCCAAGTCTGCCAGTA   |
| CPT1C     | Forward | GGATGGCACTGAAGAGGAAA     |
|           | Reverse | TCCTGGAAAAGGCATCTCTC     |
| ACAT1     | Forward | CACGCCTTTCACCAGTGGTGAC   |
|           | Reverse | GGCATTGGTGATCCAGGCTTTG   |
| ACADS     | Forward | CACGCCTTTCACCAGTGGTGAC   |
|           | Reverse | GGCATTGGTGATCCAGGCTTTG   |
| AKT3      | Forward | CGGAAAGATTGTGTACCGTGATC  |
|           | Reverse | CTTCATGGTGGCTGCATCTGTG   |
| STAT3     | Forward | CTTTGAGACCGAGGTGTATCACC  |
|           | Reverse | GGTCAGCATGTTGTACCACAGG   |
| STAT4     | Forward | CAGTGAAAGCCATCTCGGAGGA   |
|           | Reverse | TGTAGTCTCGCAGGATGTCAGC   |
| LGMN      | Forward | CCTGAAGATGGAGGCAAGCACT   |
|           | Reverse | GTTCGTCAGGAATCCCATTGCG   |
| SORT1     | Forward | ACTCTCAGAGCCGAATGCCGTA   |
|           | Reverse | CCTTCCAGCATCTTTGTCCAGG   |
| GAA       | Forward | TCTACAGCGTGGAGTTCTCCGA   |
|           | Reverse | GCTGAAGGAACTGGTCCGCAA    |
